# Supplementary material for: NG2 expression in microglial cells affects the expression of neurotrophic and proinflammatory factors by regulating FAK phosphorylation
Source: PubMed Central journal article supplement (PMC4910048; doi:10.1038/srep27983), 2016-06-16
Supplement: srep27983-s1.pdf [file srep27983-s1.pdf]

## **NG2 expression in microglial cells affects the expression of neurotrophic and proinflammatory factors by regulating FAK phosphorylation**

Lie Zhu<sup>1,#</sup>, Qing Su<sup>2,#</sup>, Xiang Jie<sup>1,#</sup>, Antang Liu<sup>1</sup>, Hui Wang<sup>1</sup>, Beiping He<sup>3</sup>, Hua Jiang<sup>1,\*</sup>

<sup>1</sup>Department of Plastic Surgery, Chang Zheng Hospital, Second Military Medical University, Shanghai 200003, China

<sup>2</sup>Department of Ophthalmology, Chang Zheng Hospital, Second Military Medical University, Shanghai 200003, China

<sup>3</sup>Department of Anatomy, Yong Loo Lin School of Medicine, National University of Singapore, Singapore

# Lie Zhu, Qing Su and Xiang Jie equally contributed to this work.

\*Corresponding author:

Hua Jiang, Department of Plastic Surgery, Chang Zheng Hospital, Second Military Medical University, No. 415 Fengyang Road, Shanghai, China. 200003. E-mail: dosjh@126.com. Tel: 86-21-81885771; Fax: 86-21-63520020

## Supplementary Materials and Methods

### Behavioral tests

All behavioral tests were performed with the same cohort of mice (8KO and 8 WT). Two tests were performed, rotarod test and Catwalk analysis. For the rotarod test, an accelerating rotarod (Med Associates, Inc., St Albans, USA) was used to test neuromotor function as previously described<sup>1</sup> in the mice on three consecutive days. Initially a trial was performed of 2 min at 4 rpm, then four tests were performed with an acceleration of 4–40 rpm over 5 min. The delay before falling from the accelerating rod was measured and the results from the last test were recorded for each animal. For Catwalk analysis, the Catwalk system (Noldus Information Technology, Wageningen, The Netherlands) was employed, as previously described<sup>1,2</sup>, to assess gait. Briefly, each mouse had to cross a glass plate three times during which gait was monitored using a high speed camera. Stride length, duration of stance, swing speed and regularity index (% regular patterns) were recorded and averaged from the triplicate measurements.

### Clinical chemistry

WT and KO mice were orally administered FAK inhibitor TAE226 (30 mg/kg) or methylcellulose as a vehicle control once a day for 7 days. Clinical chemistry was performed on plasma samples collected from the mice on day 7 or 28 as previously described<sup>3</sup>. Briefly, mice were anesthetized with CO<sub>2</sub> and blood was collected via cardiac puncture exsanguination. The following parameters were evaluated: alanine aminotransferase, aspartate aminotransferase, alkaline phosphatase, albumin, urea, glucose, cholesterol, triglycerides, total bilirubin and total protein, using an automatic chemistry analyzer (Analyst III, Hemagen Diagnostics, Inc., Columbia, MD, USA).

### Supplementary References

- 1 Verheijden, S. *et al.* Peroxisomal multifunctional protein-2 deficiency causes neuroinflammation and degeneration of Purkinje cells independent of very long chain fatty acid accumulation. *Neurobiology of disease* **58**, 258-269, (2013).
- 2 Vandeputte, C. *et al.* Automated quantitative gait analysis in animal models of movement disorders. *BMC neuroscience* **11**, 92, (2010).
- 3 Golubovskaya, V., Curtin, L., Groman, A., Sexton, S. & Cance, W. G. In vivo toxicity, metabolism and pharmacokinetic properties of FAK inhibitor 14 or Y15 (1, 2, 4, 5-benzenetetramine tetrahydrochloride). *Archives of toxicology* **89**, 1095-1101, (2015).

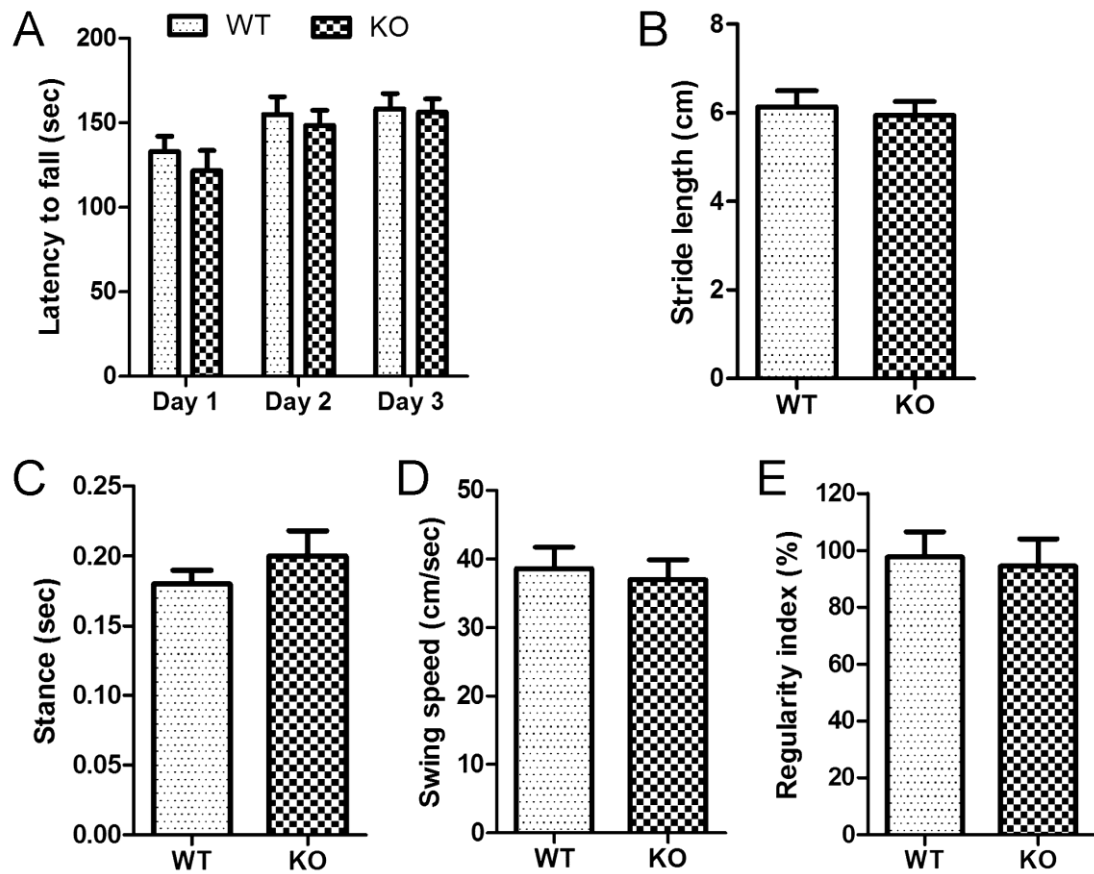

**Fig. S1** Rotarod and Catwalk analyses to test the motor faculties of the WT and KO mice. (A) Rotarod tests were performed on three consecutive days, and the latency time (sec) before falling from the accelerating rod was measured for each mouse. (B–E) Catwalk tests were performed to analyze gait by measuring the following parameters: (B) stride length, (C) duration of stance, (D) swing speed, and (E) regularity index (% regular patterns).

Table S1. Analysis of clinical chemistry parameters in WT and KO mice treated with the TAE226 FAK inhibitor or the vehicle only control

| Analyte                 | WT mice      |              | KO mice      |              |
|-------------------------|--------------|--------------|--------------|--------------|
|                         | Control      | TAE226       | Control      | TAE226       |
| ALT (U/L)               | 41.78±6.81   | 44.35±4.95   | 40.98±7.05   | 44.82±5.16   |
| AST (U/L)               | 115.07±14.46 | 117.92±21.07 | 114.62±20.18 | 120.94±25.37 |
| ALP (U/L)               | 135.62±21.19 | 147.65±28.54 | 129.41±25.24 | 136.32±15.03 |
| Albumin (g/dL)          | 2.85±0.22    | 3.04±0.38    | 2.73±0.27    | 3.31±0.21    |
| Urea (mg/dL)            | 18.47±3.57   | 25.71±2.45   | 16.51±3.08   | 22.47±1.89   |
| Glucose (mg/dL)         | 221.38±25.14 | 217.57±37.51 | 224.92±40.25 | 230.53±23.22 |
| Cholesterol (mg/dL)     | 156.54±17.27 | 158.16±21.33 | 149.35±20.14 | 150.40±17.05 |
| Triglycerides (mg/dL)   | 133.31±20.08 | 131.80±15.47 | 134.84±25.11 | 138.17±21.24 |
| Total bilirubin (mg/dL) | 0.18±0.07    | 0.23±0.05    | 0.20±0.01    | 0.22±0.08    |
| Total protein (g/dL)    | 4.85±0.23    | 4.39±0.51    | 4.48±0.72    | 4.74±0.16    |

Values are expressed as the mean ± standard deviation. n = 6 mice per group. ALT: alanine aminotransferase; AST: aspartate aminotransferase; ALP: alkaline phosphatase.
